# Supplementary material for: High-performance Co 4 S 3 -MnS-MoS 2 @CC catalysts for the hydrogen evolution reaction
Source: Royal Society of Chemistry journal article supplement (doi:10.1039/d5ta01698c), 2025-01-01
Supplement: d5ta01698c1.pdf [file d5ta01698c1.pdf]

# Supporting Information

## **High-Performance Co<sub>4</sub>S<sub>3</sub>-MnS-MoS<sub>2</sub>@CC Catalysts for Hydrogen Evolution Reaction**

Sizhan Shu<sup>a, 1</sup>, Denglin Zhu<sup>a, 1</sup>, Xuejun Wang<sup>a</sup>, Jun Sun<sup>a</sup>, Jiani Wang<sup>a</sup>, Qian Ling<sup>a</sup>,  
Zile Zhou<sup>a</sup>, Yujia Chen<sup>a</sup>, Pingfan Wu<sup>a,b \*</sup>

<sup>a</sup>*Hubei Univ Technol, Institute of POM-based Materials, Hubei Prov Key Lab Green  
Mat Light Ind, New Mat & Green Mfg Talent Intro & Innovat Demonst, Wuhan  
430068, China,*

<sup>b</sup> *Hubei Longzhong Lab, Xiangyang 441000, Hubei, Peoples R China*

\* Corresponding authors.

*E-mail address:* [pingfanwu-111@163.com](mailto:pingfanwu-111@163.com) (P. Wu).

*E-mail address:* [13995976671@163.com](mailto:13995976671@163.com) (S. Shu).

<sup>1</sup> These authors contributed equally in this work.

## 21 Experiment

### 22 Testing methods:

23 Fourier transform infrared (FT-IR) spectra were measured on a Nicolet iS50  
24 infrared spectrometer using KBr pellets. X-ray diffraction (XRD) patterns were tested  
25 on an X-ray diffractometer (Rigaku Ultima IV, Cu K $\alpha$  radiation  $\lambda=0.154178$  nm). X-  
26 ray photoelectron spectra (XPS) were tested on an ESCALAB 250Xi equipped with  
27 ex situ treatment chamber and the binding energy of C1s (284.8 eV) was used as the  
28 reference to correct the measured binding energy. Scanning electron microscopy  
29 (SEM) images were obtained on a cold-field emission BUCT. The atomic absorption  
30 test results were obtained on the German continuous light source atomic absorption  
31 spectrometer (GB/T 15337-2008). High resolution transmission electron microscopy  
32 (HRTEM) images and elemental mapping results were obtained on a Tecnai G2 F20  
33 U-TWIN.

### 34 Electrochemical testing

35 All electrochemical tests were conducted at room temperature  
36 using a CHI760E electrochemical workstation. The electrocatalytic performance of  
37 the materials was evaluated using a three-electrode system, with reference electrodes  
38 being Hg/Hg<sub>2</sub>Cl<sub>2</sub> in 0.5 M H<sub>2</sub>SO<sub>4</sub> and Hg/HgO in 1 M KOH, a graphite rod serving as  
39 the counter electrode, and a modified carbon cloth as the working electrode with a  
40 geometric area of 1 cm  $\times$  1 cm. The potentials for all reversible hydrogen electrode  
41 (RHE) measurements were calculated using the equations  $E_{\text{RHE}} = E_{\text{Hg/HgO}} + 0.098 +$   
42  $0.059 \text{ pH}$  for 1 M KOH and  $E_{\text{RHE}} = E_{\text{Hg/Hg}_2\text{Cl}_2} + 0.244 + 0.059 \text{ pH}$  for 0.5 M H<sub>2</sub>SO<sub>4</sub>.

43 Linear sweep voltammetry (LSV) was performed in both 1 M KOH and 0.5 M H<sub>2</sub>SO<sub>4</sub>  
 44 electrolytes with a scan rate of 2 mV/s. Tafel plots were fitted to the linear regions of  
 45 the Tafel equation ( $\eta = a + b \log j$ ). Electrochemical impedance spectroscopy (EIS)  
 46 was conducted over a frequency range of 0.01 kHz to 100 kHz with an amplitude of 5  
 47 mV and a test potential of 0.1 V. Furthermore, cyclic voltammetry tests were carried  
 48 out within a potential range of 0.1 V to 0.2 V at scan rates of 10, 20, 30, 40, 50, 60, 70,  
 49 and 80 mV/s. All data were corrected for a 90% IR drop.

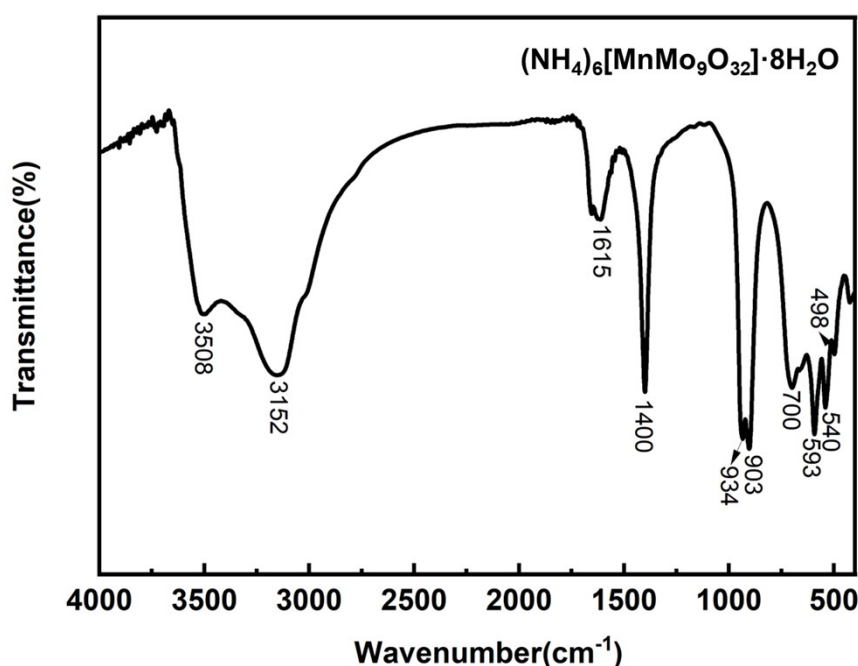

Fig. S1. Infrared spectrum of  $\text{MnMo}_9$

53 **Synthesis of  $(\text{NH}_4)_6[\text{MnMo}_9\text{O}_{32}] \cdot 8\text{H}_2\text{O}$ :** Initially, 1 mmol of ammonium  
 54 paramolybdate was dissolved in 10 mL of deionized water, and the pH was adjusted  
 55 to 5.1 with glacial acetic acid. Then, 7 mmol of manganese sulfate was dissolved in  
 56 10 mL of deionized water, and the two solutions were mixed. The mixture was stirred

57 and heated to boiling, resulting in a yellow precipitate. Subsequently, 2 mmol of  
58 sodium persulfate was dissolved in 5 mL of water and added to the aforementioned  
59 mixture, which was then heated to a solution temperature of 80°C, turning the  
60 solution orange-red. This temperature was maintained for approximately 30 minutes,  
61 after which the solution was left to stand overnight at room temperature until orange-  
62 red crystals precipitated. The crude product was obtained after filtration, washing, and  
63 air-drying. The product was recrystallized three times to yield the crystalline product  
64  $\text{MnMo}_9$ .

65 **IR Characterization of  $\text{MnMo}_9$ :** The synthesized polyoxometalate  $\text{MnMo}_9$  was  
66 characterized by Fourier-transform infrared spectroscopy, as shown in Fig. S1. The  
67 infrared spectrum revealed characteristic absorption peaks for water molecules' O-H  
68 bonds at 3508  $\text{cm}^{-1}$  and 1615  $\text{cm}^{-1}$ ; vibrational absorption peaks for  $\text{NH}_4^+$  at 3152  $\text{cm}^{-1}$   
69 and 1400  $\text{cm}^{-1}$ ; and peaks in the range of 1000  $\text{cm}^{-1}$  to 400  $\text{cm}^{-1}$ , which are  
70 characteristic of Waugh-type polyoxometalate anions, with specific absorption peaks  
71 at 934  $\text{cm}^{-1}$  and 903  $\text{cm}^{-1}$  arising from the stretching vibrations of  $\text{Mo}=\text{O}$ ; peaks at 700  
72  $\text{cm}^{-1}$ , 593  $\text{cm}^{-1}$ , and 540  $\text{cm}^{-1}$  resulting from the bending vibrations of  $\text{Mo}-\text{O}-\text{Mo}$ ; and  
73 the characteristic absorption peak at 498  $\text{cm}^{-1}$  resulting from the bending vibrations of  
74  $\text{Mn}-\text{O}-\text{Mo}$ . All the aforementioned peaks are consistent with those described in the  
75 literature.[1]

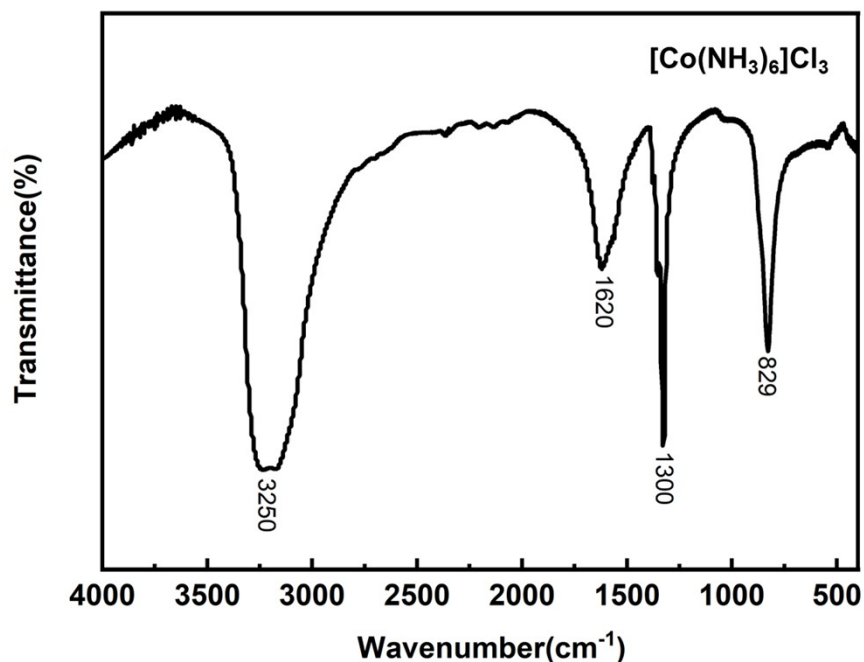

**Fig. S2. Infrared spectrum of  $[\text{Co}(\text{NH}_3)_6]\text{Cl}_3$**

**Synthesis of  $[\text{Co}(\text{NH}_3)_6]\text{Cl}_3$ :** Initially, 110 mmol of ammonium chloride was dissolved in 12 mL of deionized water and heated to boiling. Then, 70 mmol of cobalt chloride was added to the ammonium chloride solution, which was dissolved upon heating and then transferred to a beaker containing 0.5 g of activated carbon. After cooling, 20 mL of concentrated ammonium hydroxide was added, and the mixture was cooled again to below 10°C. Under stirring, 8 mL of a 10% hydrogen peroxide solution was slowly added, and the temperature was raised to 60°C and maintained for 20 minutes, followed by cooling again. Then, 75 mL of a 0.5 mol/L hydrochloric acid aqueous solution was added, and the mixture was heated to boiling. After the precipitate dissolved, it was filtered while hot. To the filtrate, 20 mL of 6 mol/L hydrochloric acid was slowly added, resulting in the precipitation of an orange-yellow product. This product was cooled with ice water, filtered, and washed with cold dilute

92 hydrochloric acid, and then air-dried.

93       **IR Characterization of  $[\text{Co}(\text{NH}_3)_6]\text{Cl}_3$ :** Fig. S2 shows the infrared spectrum of  
94  $[\text{Co}(\text{NH}_3)_6]\text{Cl}_3$ . The spectrum displays four major characteristic absorption peaks: (1)  
95 a strong absorption peak at  $829\text{ cm}^{-1}$  corresponding to the Co-N rocking vibration, (2)  
96 a sharp absorption peak at  $1300\text{ cm}^{-1}$  corresponding to the symmetric bending  
97 vibration of the N-H bond, (3) an absorption peak at  $1620\text{ cm}^{-1}$  corresponding to the  
98 asymmetric bending vibration of the N-H bond, and (4) an absorption peak at  $3250$   
99  $\text{cm}^{-1}$  corresponding to the asymmetric stretching vibration of the N-H bond. These are  
100 highly consistent with those reported in the literature<sup>2</sup>, indicating that we have  
101 successfully synthesized  $[\text{Co}(\text{NH}_3)_6]\text{Cl}_3$ .

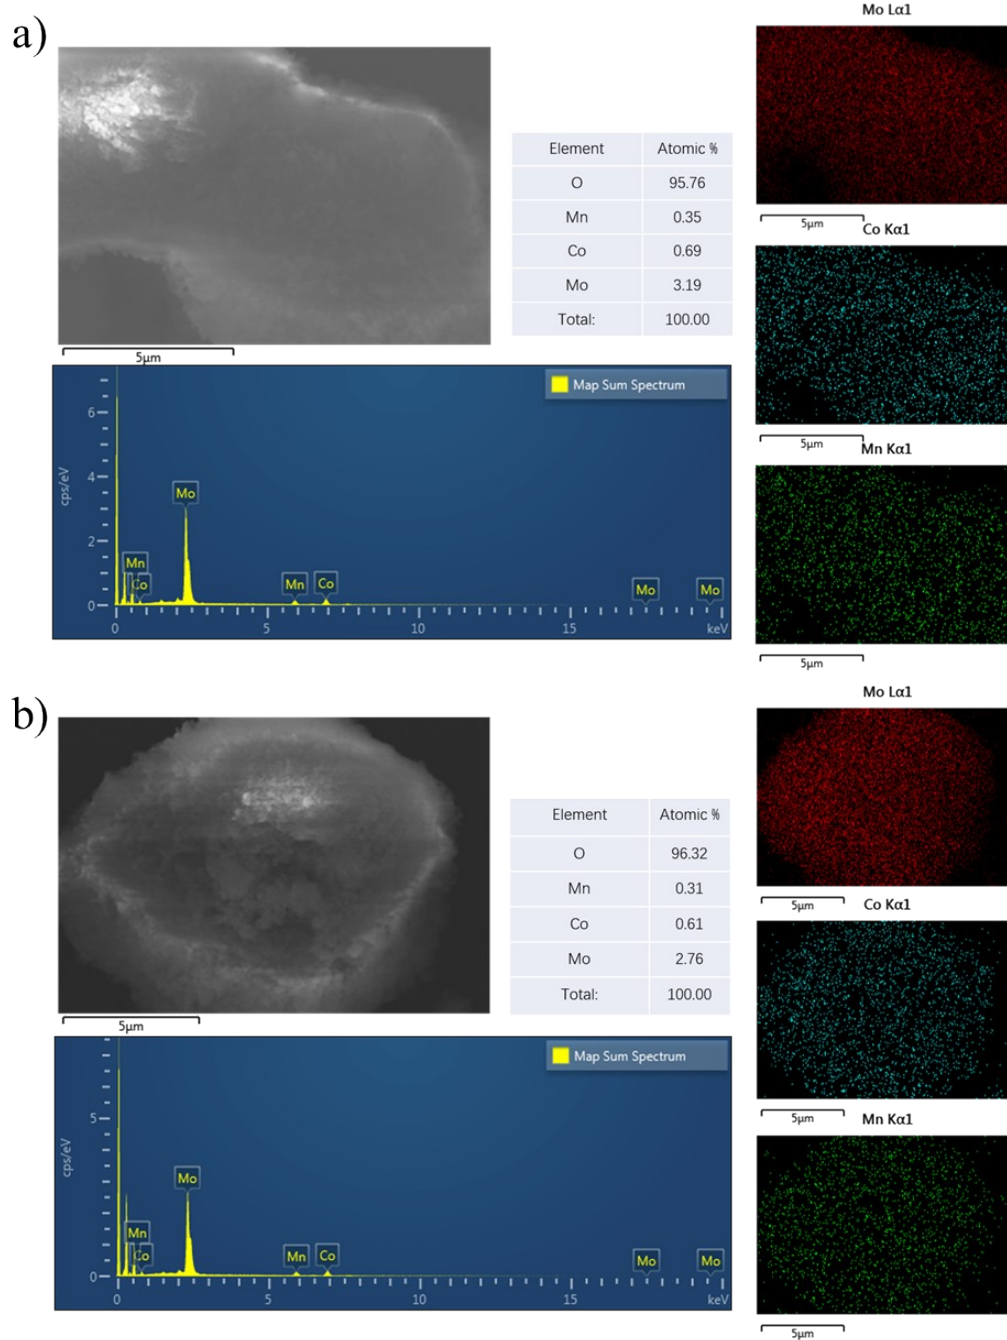

**Fig. S3. EDS images of the  $\text{Co}_2\text{MnMo}_9$**

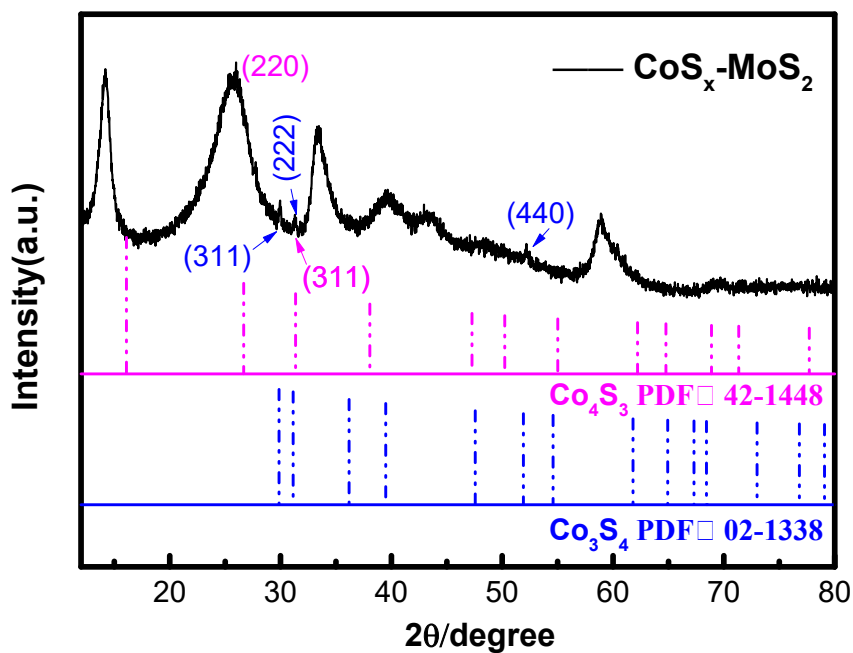

Fig. S4. XRD patterns of the  $\text{Co}_x\text{S}-\text{MoS}_2@\text{CC}$

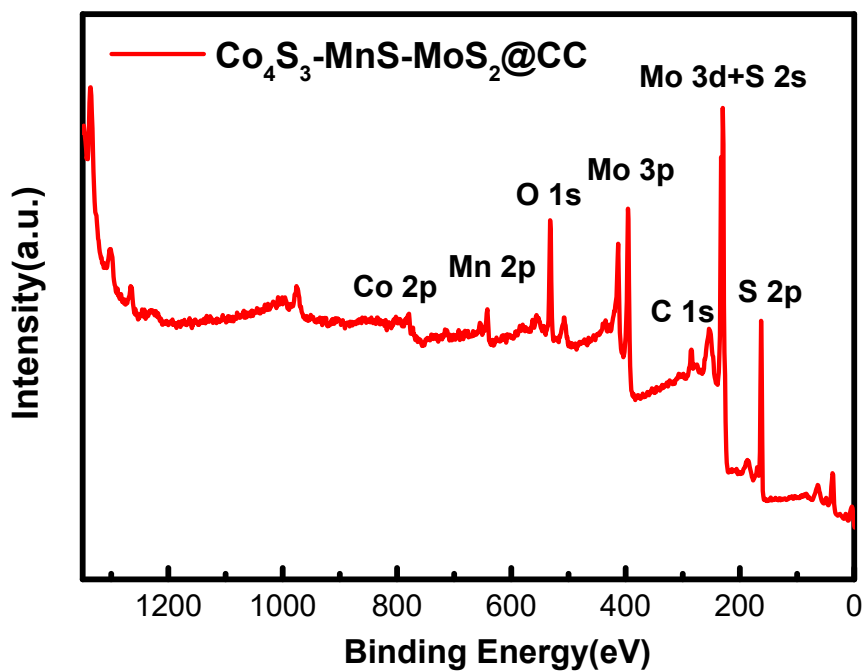

Fig. S5. full survey XPS spectra of the  $\text{Co}_4\text{S}_3\text{-MnS-MoS}_2@\text{CC}$



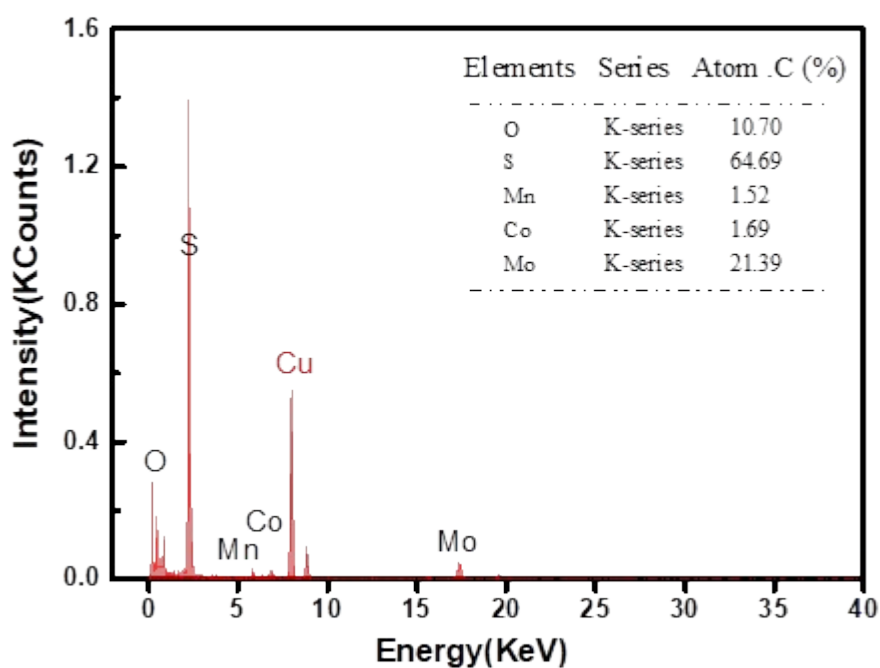

Fig. S6. EDS images of the Co<sub>4</sub>S<sub>3</sub>-MnS-MoS<sub>2</sub>@CC (Note: The Cu peak at ~8 keV corresponds to the copper grid used during sample preparation, and is not part of the sample itself)

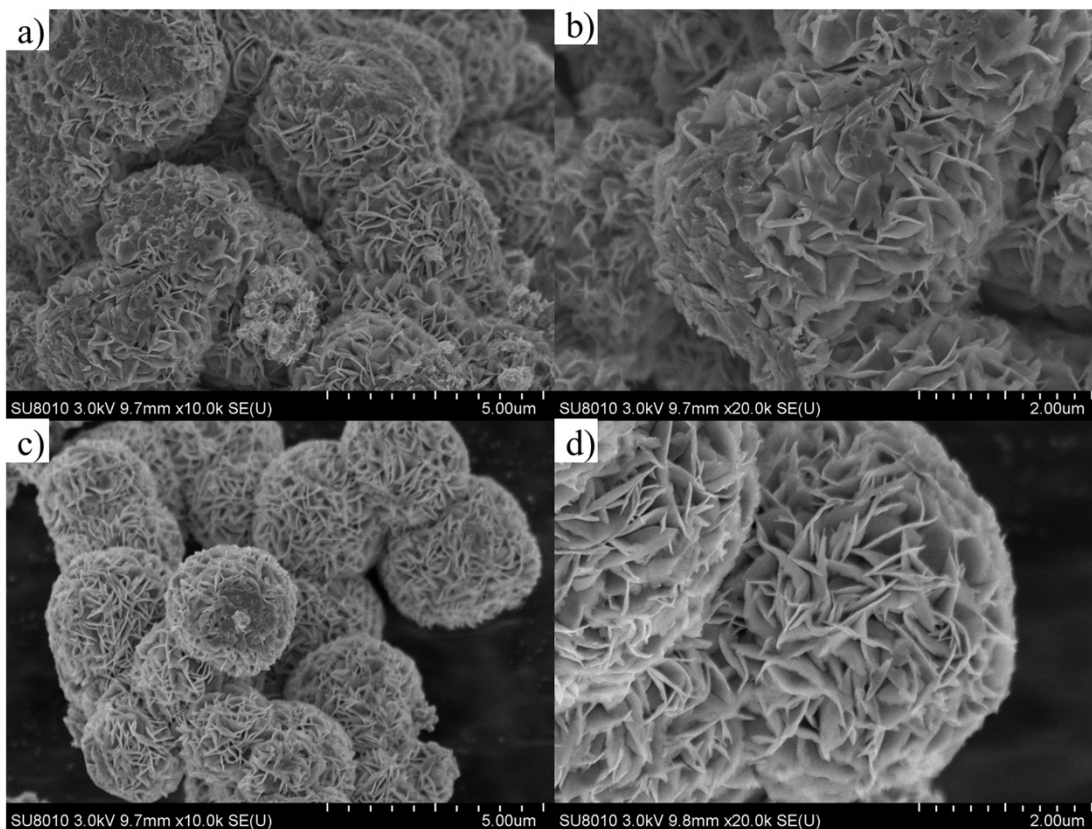

**Fig. S7. SEM images of the  $\text{Co}_4\text{S}_3\text{-MnS-MoS}_2@\text{CC}$ ; a-b) before calcination ; c-d) after calcination**

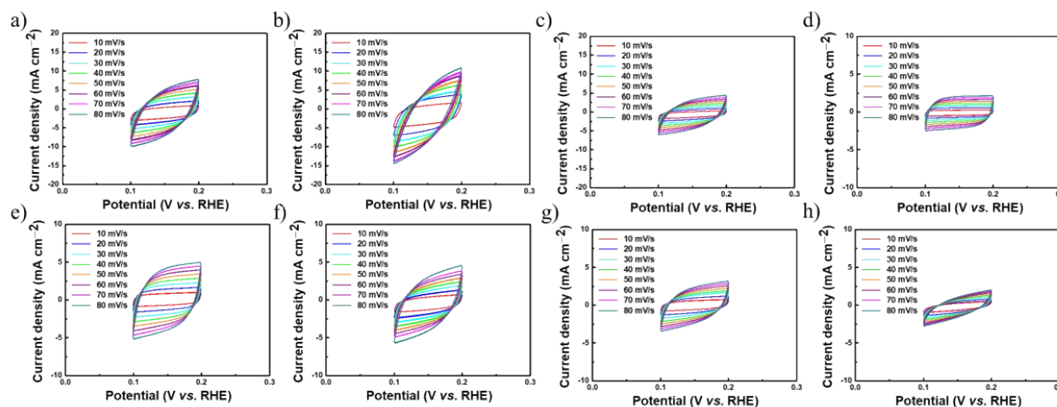

**Fig. S8. CV of  $\text{Co}_4\text{S}_3\text{-MnS-MoS}_2@\text{CC}$ ,  $\text{MnS-MoS}_2@\text{CC}$ ,  $\text{Co}_x\text{S-MoS}_2@\text{CC}$  and  $\text{MoS}_2@\text{CC}$  tested at various scan rates from 10 to 80  $\text{mV/s}$ . a-c) In 1 M KOH; d-f) In 0.5 M  $\text{H}_2\text{SO}_4$**

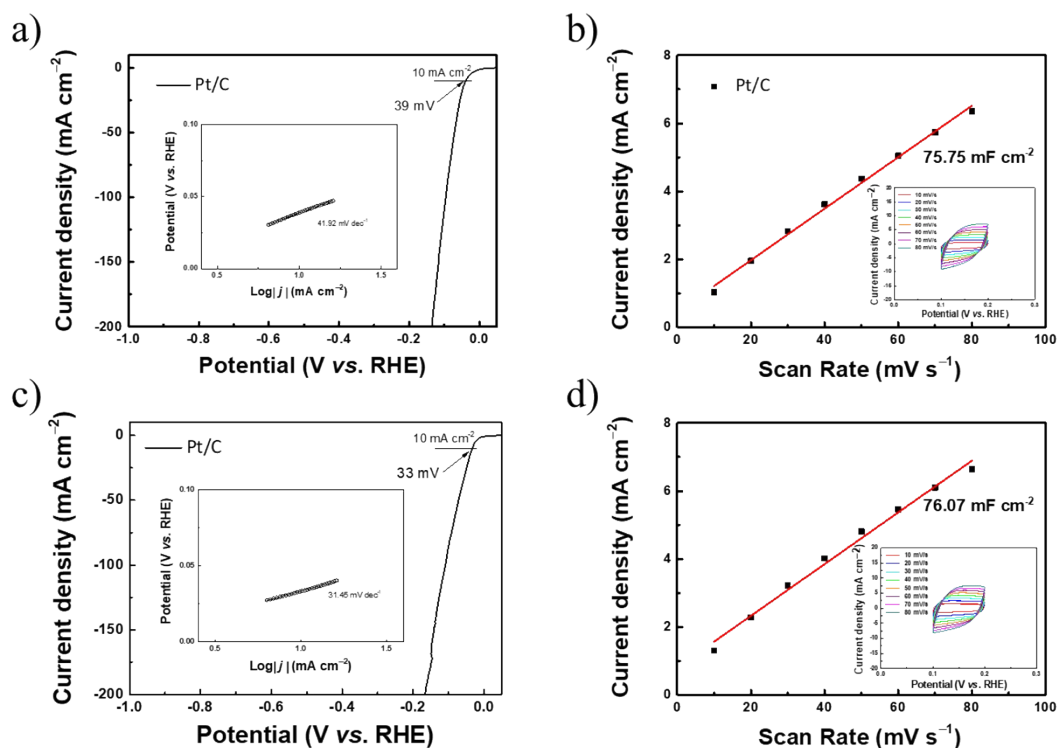

Fig. S9. HER performance of the Pt/C@CC. a-b) In 1 M KOH; c-d) In 0.5 M  $\text{H}_2\text{SO}_4$

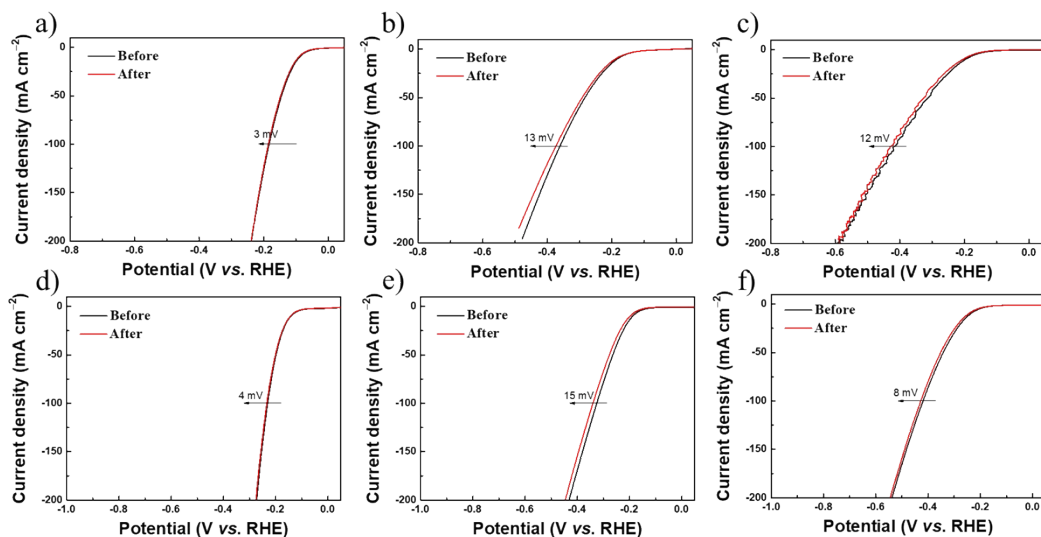

Fig. S10. a-b) Polarization curves of  $\text{Co}_4\text{S}_3\text{-MnS-MoS}_2\text{@CC}$ ,  $\text{MnS-MoS}_2\text{@CC}$  and  $\text{MoS}_2\text{@CC}$  before and after 5000 CV cycles. a-c) In 1 M KOH; d-f) In 0.5 M  $\text{H}_2\text{SO}_4$

123

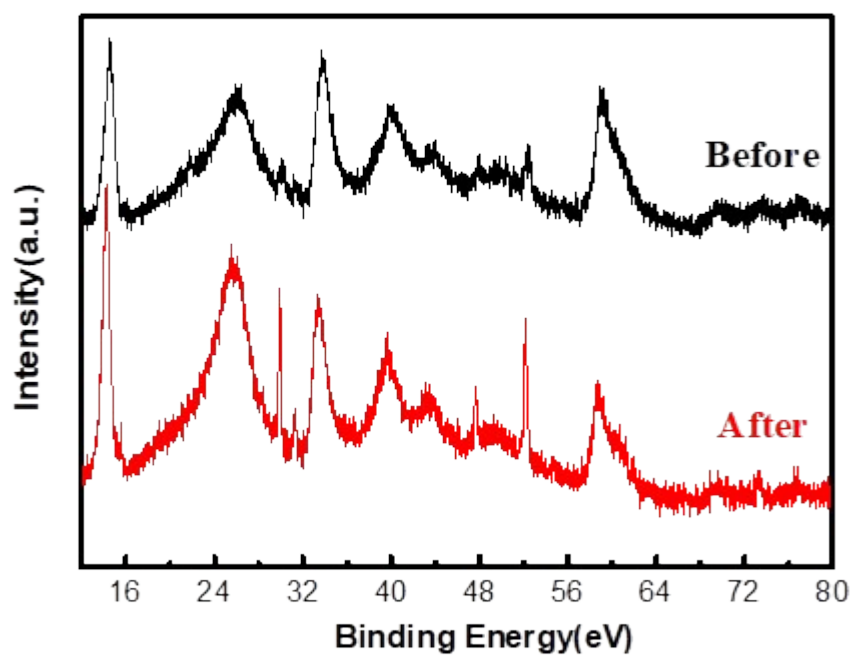

124

**Fig. S11. XRD patterns of  $\text{Co}_4\text{S}_3\text{-MnS-MoS}_2\text{@CC}$**

125

126

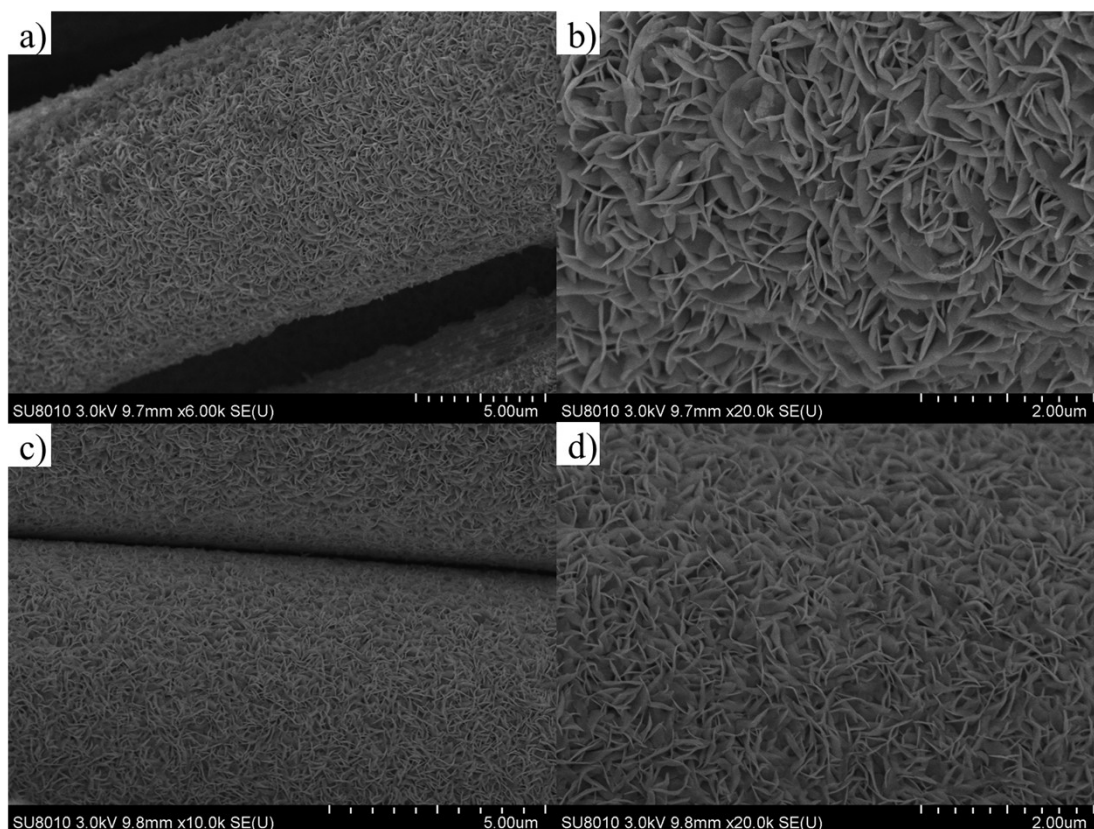

**Fig. S12. SEM images of the  $\text{Co}_4\text{S}_3\text{-MnS-MoS}_2\text{@CC}$ . a-b) After i-t tests in 1 M KOH; c-d) After i-t tests in 0.5 M  $\text{H}_2\text{SO}_4$**

| Catalyst                                            | LSV/ $\eta_{10}/\text{mV}$ | Ref.                                                  |
|-----------------------------------------------------|----------------------------|-------------------------------------------------------|
| $\text{Co}_4\text{S}_3\text{-MnS-MoS}_2\text{@CC}$  | 88                         | this work                                             |
| $\text{Ni}_4\text{Mo}$                              | 51                         | S.Energy Fuels.2024,8(8),1619-1625. <sup>3</sup>      |
| $\text{CoS}_2\text{-MoS}_2$                         | 251                        | J. Alloy.Comp.2023,948,169655. <sup>4</sup>           |
| $\text{NC@MoS}_2$                                   | 145                        | J.Hydrogen Energy. 2024,56,570-581. <sup>5</sup>      |
| $\text{NiO/MoS}_2/\text{BiVO}_4$                    | 95                         | J.Hydrogen Energy. 2024,52,275-287. <sup>6</sup>      |
| $\text{Ce-NiMoO}_4/\text{MoS}_2\text{@rGO}$         | 153                        | ACS Applied Engineering Materials, 2024. <sup>7</sup> |
| $\text{MoS}_2\text{-Ni}_3\text{S}_2\text{-CNTs/NF}$ | 169                        | J.Hydrogen Energy.2024,91,196-203. <sup>8</sup>       |
| $\text{TM SAs-MoS}_2$                               | 80                         | A.Energy Materials.2024,14(35),2401716. <sup>9</sup>  |
| $1\text{T-2H MoS}_2$                                | 212                        | Chem Engineering J. 2023, 460,141858. <sup>10</sup>   |
| $(\text{NH}_4)_2\text{MoS}_4$                       | 248                        | Inorganic Chem.2023, 62(2),841-852. <sup>11</sup>     |
| $\text{N-MoS}_2/\text{COF-C}_4\text{N}$             | 106                        | Catalysts.2023, 13(1),90. <sup>12</sup>               |
| $\text{AC/MoS}_2$                                   | 136                        | J.Hydrogen Energy.2024, 55,1360-1370. <sup>13</sup>   |
| $\text{Co-1T-MoS}_2\text{-bpe}$                     | 118                        | A.Chemie 2023,135(48), e202313845. <sup>14</sup>      |
| $\text{Co-MoS}_2/\text{Ni}_3\text{S}_2/\text{Ni}$   | 43                         | J.Hydrogen Energy.2024, 67,42-49. <sup>15</sup>       |

**Table S1. Comparison of HER performance of  $\text{Co}_4\text{S}_3\text{-MnS-MoS}_2\text{@CC}$  catalyst with reported  $\text{MoS}_2$ -based catalysts in 1 M KOH**

134 **Reference:**

- 135 [1] D. Zammel, I. Nagazi, A. Haddad, Synthesis and Characterization of a Novel  
136 Waugh-Type Polyoxometalate  $K_{1.5}(NH_4)_{4.5}[MnMo_9O_{32}] \cdot 4.2H_2O$ , Journal of  
137 Cluster Science 26(5) (2015) 1693-1706. [https://doi.org/10.1007/s10876-015-0868-](https://doi.org/10.1007/s10876-015-0868-8)  
138 [8](https://doi.org/10.1007/s10876-015-0868-8).
- 139 [2] C. Wang, H. Zhan, X. Lu, R. Jing, H. Zhang, L. Yang, X. Li, F. Yue, D. Zhou,  
140 Q. Xia, A recyclable cobalt(iii)-ammonia complex catalyst for catalytic  
141 epoxidation of olefins with air as the oxidant, New Journal of Chemistry 45(4)  
142 (2021) 2147-2156. <https://doi.org/10.1039/D0NJ05466F>.
- 143 [3] D. Wei, S. Yanmei, Z. Wei, Y. Yifu, Z. Bin, Unveiling the In Situ Dissolution  
144 and Polymerization of Mo in Ni<sub>4</sub>Mo Alloy for Promoting the Hydrogen  
145 Evolution Reaction, Angewandte Chemie 133(13) (2021) 7127-7131.  
146 <https://doi.org/10.1002/anie.202015723>.
- 147 [4] P. Cao, X. Zhang, L. Wang, H. Fu, Alloying Ni<sub>4</sub>Mo for efficient alkaline  
148 hydrogen oxidation and hydrogen evolution reactions, Sustainable Energy &  
149 Fuels 8(8) (2024) 1619-1625. <https://doi.org/10.1039/D4SE00179F>.
- 150 [5] K. Chanda, P. Bairi, S. Maiti, A. Tripathi, R. Thapa, S. Ghosh, K. Panigrahi,  
151 D. Roy, R. Sarkar, K.K. Chattopadhyay, Crystallinity and interfacial Mo–N–C  
152 bond engineered MoS<sub>2</sub> embedded graphitic nitrogen doped carbon hollow  
153 sphere for enhanced HER activity, International Journal of Hydrogen Energy 56  
154 (2024) 570-581. <https://doi.org/https://doi.org/10.1016/j.ijhydene.2023.12.159>.

- [6] K.K. Mandari, S. Pandey, M. Kang, Highly efficient ternary NiO/MoS<sub>2</sub>/BiVO<sub>4</sub> heterostructure for electrocatalytic HER/OER applications, *International Journal of Hydrogen Energy* 52 (2024) 275-287. <https://doi.org/https://doi.org/10.1016/j.ijhydene.2023.07.058>.
- [7] M. Ali, M. Wahid, K. Majid, Tailored Ce-Doped NiMoO<sub>4</sub>/MoS<sub>2</sub>@rGO Nanoarchitectures for Sustainable Electrochemical Water Splitting in Alkaline Medium, *ACS Applied Engineering Materials* (2024). <https://doi.org/10.1021/acsaenm.4c00533>.
- [8] L. Li, X. Li, H. Li, Self-supported MoS<sub>2</sub>-Ni<sub>3</sub>S<sub>2</sub>-CNTs/NF electrodes with super-hydrophilic multistage micro-nanostructures for efficient bifunctional monolithic water splitting, *International Journal of Hydrogen Energy* 91 (2024) 196-203. <https://doi.org/https://doi.org/10.1016/j.ijhydene.2024.10.041>.
- [9] MengLi, XuanWang, HanDu, WenrouDong, SongboYe, HengLiu, HuameiSun, KaiHuang, HaoLi, YawenTang, GengtaoFu, Oxophilic Tm-Sites in MoS<sub>2</sub> Trigger Thermodynamic Spontaneous Water Dissociation for Enhanced Hydrogen Evolution, *Advanced Energy Materials* 14(35) (2024) 2401716-2401716. <https://doi.org/10.1002/aenm.202401716>.
- [10] Z. Hong, W. Hong, B. Wang, Q. Cai, X. He, W. Liu, Stable 1T -2H MoS<sub>2</sub> heterostructures for efficient electrocatalytic hydrogen evolution, *Chemical Engineering Journal* 460 (2023) 141858. <https://doi.org/https://doi.org/10.1016/j.cej.2023.141858>.

- [11] S. Venkateshwaran, A. Ajith, V. Duraisamy, A. Krishnan, S.M. Senthil Kumar, Tailoring of 1T Phase-Domain MoS<sub>2</sub> Active Sites with Bridging S<sub>2</sub>–/Apical S<sub>2</sub>– Phase-Selective Precursor Modulation for Enriched HER Kinetics, *Inorganic Chemistry* 62(2) (2023) 841-852. <https://doi.org/10.1021/acs.inorgchem.2c03608>.
- [12] N. Zhang, Z. Yang, W. Liu, F. Zhang, H. Yan, Novel Bifunctional Nitrogen Doped MoS<sub>2</sub>/COF-C<sub>4</sub>N Vertical Heterostructures for Electrocatalytic HER and OER, *Catalysts* 13(1) (2023) 90. <https://doi.org/10.3390/catal13010090>.
- [13] A.M. Homayounfard, M. Maleki, H. Ghanbari, M.H. Kahnamouei, B. Safaei, Growth of few-layer flower-like MoS<sub>2</sub> on heteroatom-doped activated carbon as a hydrogen evolution reaction electrode, *International Journal of Hydrogen Energy* 55 (2024) 1360-1370. <https://doi.org/https://doi.org/10.1016/j.ijhydene.2023.11.123>.
- [14] H. Liu, S. Zhang, Y. Chai, B. Dong, Ligand Modulation of Active Sites to Promote Cobalt-Doped 1T-MoS<sub>2</sub> Electrocatalytic Hydrogen Evolution in Alkaline Media, *Angewandte Chemie* 135(48) (2023). <https://doi.org/10.1002/anie.202313845>.
- [15] X. Tang, Y. Zhang, Y. Zhang, X. Liu, J. Cao, C. Zhang, Three-dimensional Co–MoS<sub>2</sub>/Ni<sub>3</sub>S<sub>2</sub>/Ni assembly with interfacial engineering and electronic modulation for efficient hydrogen evolution reaction, *International Journal of Hydrogen Energy* 67 (2024) 42-49. <https://doi.org/https://doi.org/10.1016/j.ijhydene.2024.04.144>.
